# Supplementary material for: Alcohol-based adsorption heat pumps using hydrophobic metal–organic frameworks
Source: Royal Society of Chemistry journal article supplement (doi:10.1039/d3ta05258c), 2023-12-11
Supplement: d3ta05258c1.pdf [file d3ta05258c1.pdf]

## Supporting Information

### Alcohol-Based Adsorption Heat Pumps using Hydrophobic Metal-Organic Frameworks

R.M. Madero-Castro<sup>a#</sup>, A. Luna-Triguero<sup>b#</sup>, C. González-Galán<sup>a</sup>, J.M. Vicent-Luna<sup>c\*</sup>, S. Calero<sup>a,c\*</sup>

<sup>a</sup>Department of Physical, Chemical, and Natural Systems, Universidad Pablo de Olavide. Ctra. Utrera km. 1. ES-41013 Seville, Spain.

<sup>b</sup>Department of Mechanical Engineering, Eindhoven University of Technology, 5600 MB Eindhoven, The Netherlands.

<sup>c</sup>Materials Simulation and Modelling, Department of Applied Physics and Science Education, Eindhoven University of Technology, 5600 MB Eindhoven, The Netherlands.

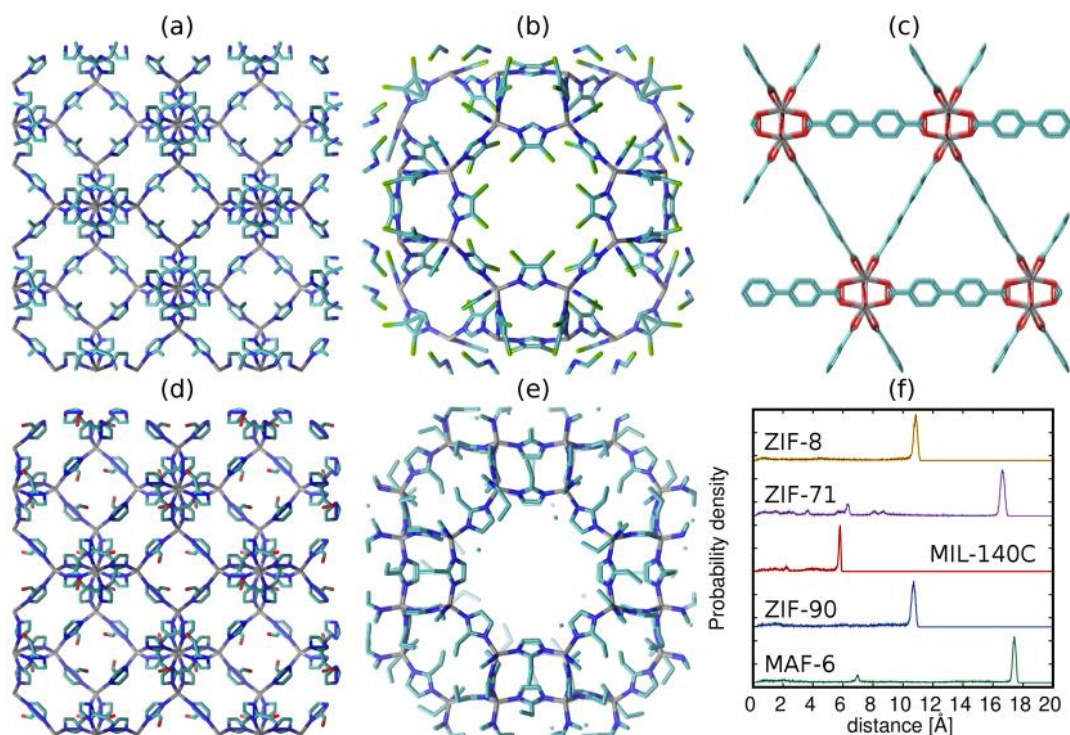

**Figure S1.** Schematic representation of the framework connectivity of (a) ZIF-8, (b) ZIF-71, (c) MIL-140C, (d) ZIF-90 and (e) MAF-6. (f) Pore Size Distribution. Nitrogen atoms are coloured in blue, carbon atoms in cyan, oxygen atoms in red, chlorine atoms in green, and zirconium and zinc atoms in grey. Hydrogen atoms are omitted for clarity.

**Table S1.** Structural properties of the selected MOFs, density, pore volume, helium void fraction, surface area, and pore size. Experimental values [1-3] are included between parentheses for comparison.

| MOF             | Topology | $\rho$ [kg m <sup>-3</sup> ] | $V_p$ [cm <sup>3</sup> g <sup>-1</sup> ] | HvF   | $S_A$ [m <sup>2</sup> g <sup>-1</sup> ] | Pore Size [Å] |
|-----------------|----------|------------------------------|------------------------------------------|-------|-----------------------------------------|---------------|
| <b>ZIF-8</b>    | SOD      | 924.586                      | 0.52 (0.685)[1]                          | 0.484 | 1732.4 (1696)[1]                        | 10.8          |
| <b>ZIF-90</b>   | SOD      | 988.431                      | 0.51 (0.485)[1]                          | 0.507 | 1661.3 (1280)[1]                        | 10.7          |
| <b>ZIF-71</b>   | RHO      | 1154.904                     | 0.42 (0.385)[1]                          | 0.496 | 1379.2 (1183)[1]                        | 16.6          |
| <b>MAF-6</b>    | RHO      | 813.579                      | 0.59 (0.61)[2]                           | 0.482 | 1664.4 (1695)[2]                        | 17.4          |
| <b>MIL-140C</b> | -        | 1173.139                     | 0.34 (0.36)[3]                           | 0.400 | 1298.9 (-)                              | 5.8           |

| MOF          | Atom       | Partial Charge [e] |
|--------------|------------|--------------------|
| (a) ZIF-8    | Zn1        | 1.022              |
|              | N1         | -0.4973            |
|              | C1         | 0.4958             |
|              | C2         | -0.0672            |
|              | C3         | -0.272             |
|              | H2         | 0.1023             |
|              | H3         | 0.0632             |
| (b) ZIF-71   | Zn1        | 1.2054             |
|              | N1         | -0.2873            |
|              | C1         | -0.24505           |
|              | C3         | 0.16585            |
|              | H1         | -0.01125           |
| (c) MIL-140C | Zr         | 1.50139            |
|              | O1         | -0.6152887         |
|              | O2         | -0.3996415         |
|              | C1         | 0.370644           |
|              | C2         | -0.107838          |
|              | C3         | 0.023914           |
|              | C4         | 0.0630835          |
|              | C5         | 0.0203093          |
|              | H3         | 0.0348988          |
|              | H4         | 0.04140775         |
|              | (d) ZIF-90 | Zn1                |
| N1           |            | -0.3229            |
| C1           |            | 0.3078             |
| C2           |            | -0.0255            |
| C3           |            | -0.4335            |
| H1           |            | 0.0321             |
| H2           |            | 0.2944             |
| (e) MAF-6    | Zn1        | 2.6                |
|              | N1         | -0.7685            |
|              | C1         | -0.1872            |
|              | C2         | 0.3068             |
|              | C3         | -0.4654            |
|              | C4         | -0.6812            |
|              | H1         | 0.1768             |
|              | H3         | 0.2185             |

**Figure S2.** Schematic representation of the organic linkers of (a) of ZIF-8, (b) ZIF-71, (c) MIL-140C, (d) ZIF-90 and (e) MAF-6. Nitrogen atoms in blue, carbon atoms in cyan, oxygen atoms in red, chlorine in yellow, hydrogen in white and zirconium and zinc atoms in grey. Partial charges of atoms of each MOF. MAF-6 charges have been taken from the literature.[4]

**Table S2.** Equilibrium adsorption conditions of methanol and ethanol for the selected MOFs.

| MOF      | Isotherm, Temperature [K] |         | Isobar, Pressure [kPa] |         |
|----------|---------------------------|---------|------------------------|---------|
|          | Methanol                  | Ethanol | Methanol               | Ethanol |
| ZIF-8    | 298                       | 298     | 5                      | 0.8     |
|          | 308                       | 308     |                        |         |
| ZIF-71   | 298                       | 298     | 8                      | 4       |
|          | 308                       | 308     |                        |         |
| MIL-140C | 298                       | 298     | 1.5                    | 4       |
| ZIF-90   | 298                       | 298     | 10                     | 3       |
|          | 308                       | 308     |                        |         |
| MAF-6    | 298                       | 298     | 10                     | 2.5     |

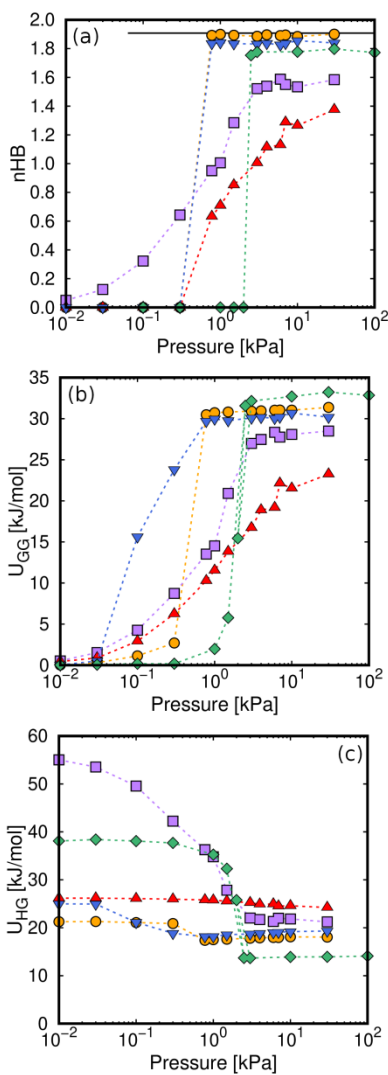

**Figure S3** (a) nHB, (b) guest-guest interactions, and (c) host-guest interactions for ethanol as a function of the pressure. Non-depicted error bars denotes fluctuations smaller than symbol size.

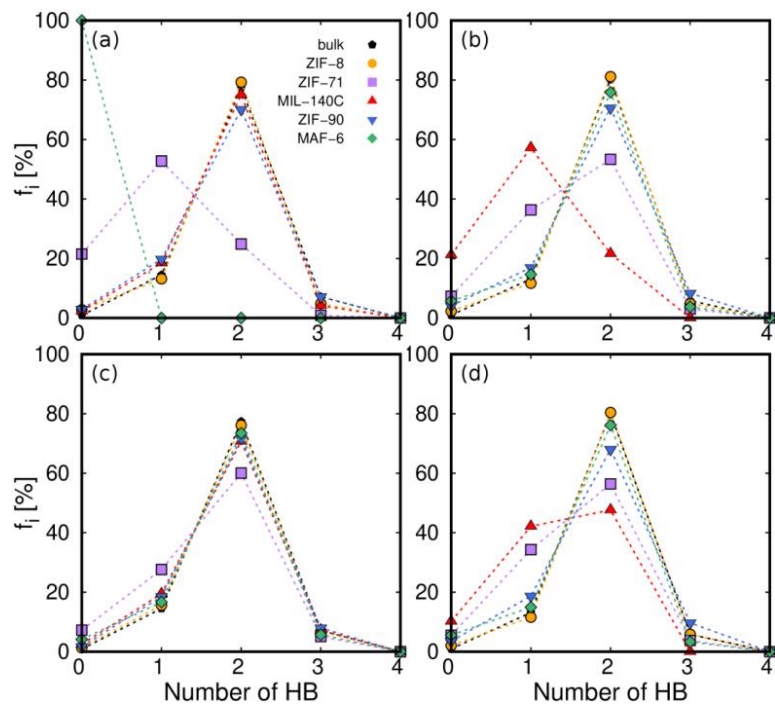

**Figure S4**  $f_i$  (percentage of molecules with  $n$  HBs) of (a) methanol and (b) ethanol at 3kPa. (c, d) the same at saturation conditions. Non-depicted error bars denotes fluctuations smaller than symbol size.

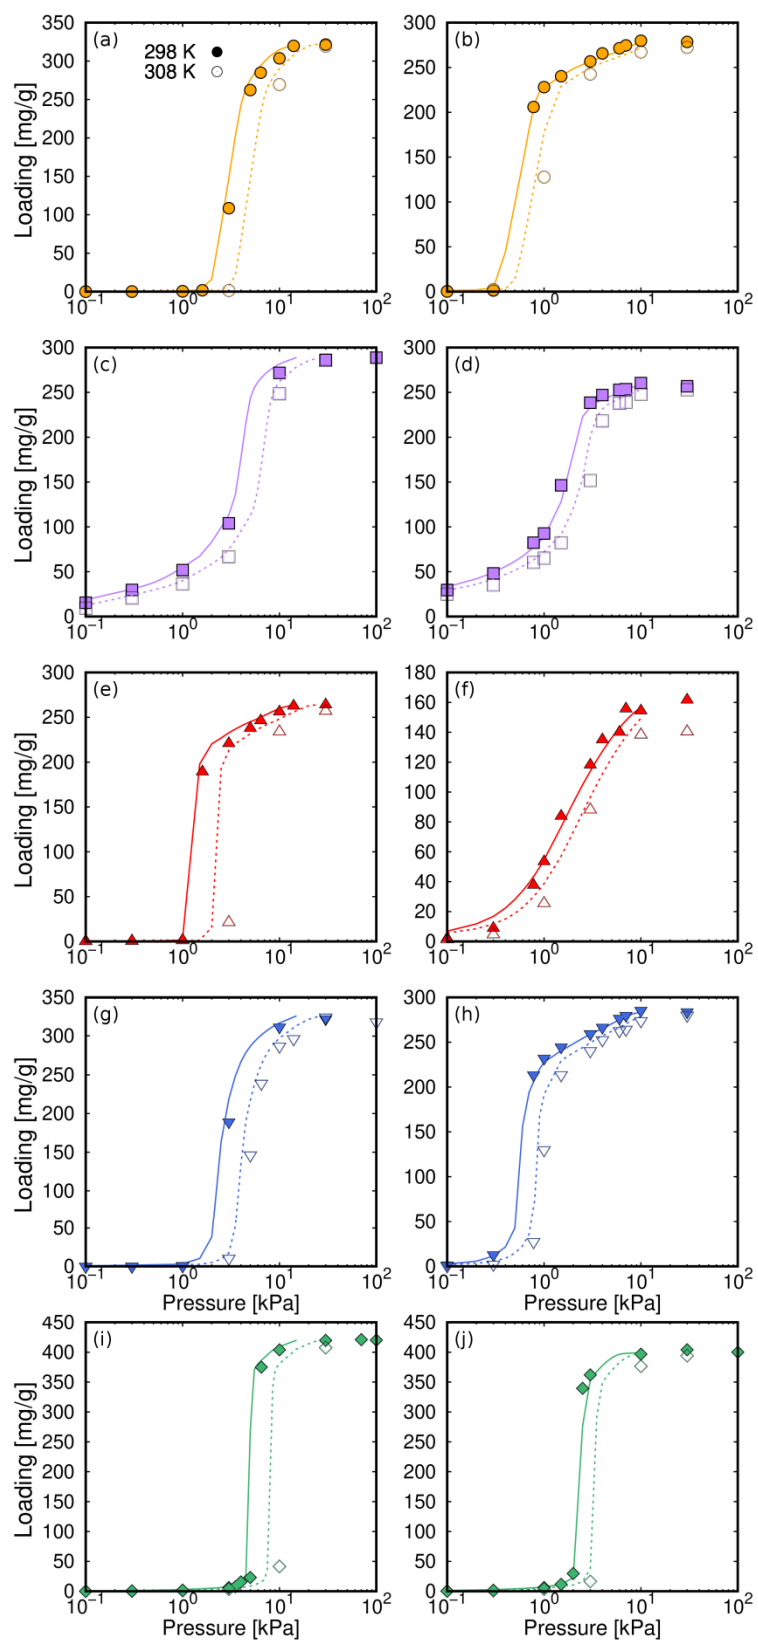

**Figure S5** Adsorption isotherms calculated with GCMC simulations (symbols) and from the characteristic curve (lines) of methanol (left column) and ethanol (right column) in (a, b) ZIF-8, (c, d) ZIF-71, (e, f) MIL-140C, (g, h) ZIF-90, and (i, j) MAF-6 at 298 K and 308 K.

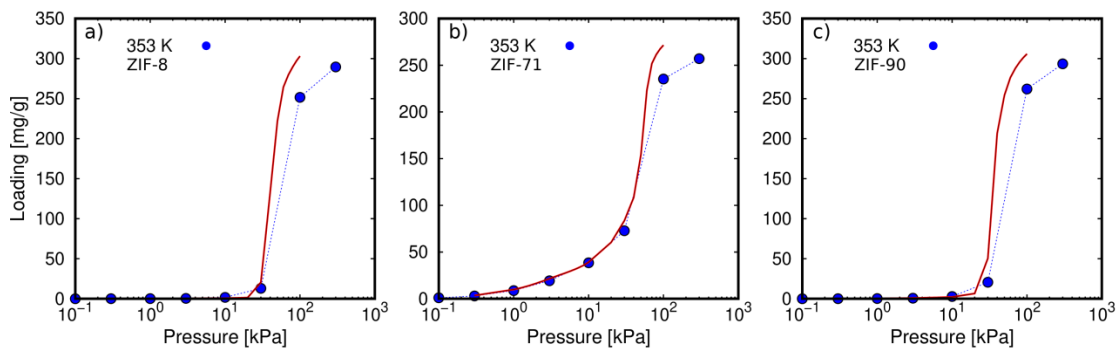

**Figure S6.** Adsorption isotherms calculated with GCMC simulations (symbols) and from the characteristic curve (lines) of methanol at 353 K in (a) ZIF-8, (b) ZIF-71, and (c) ZIF-90.

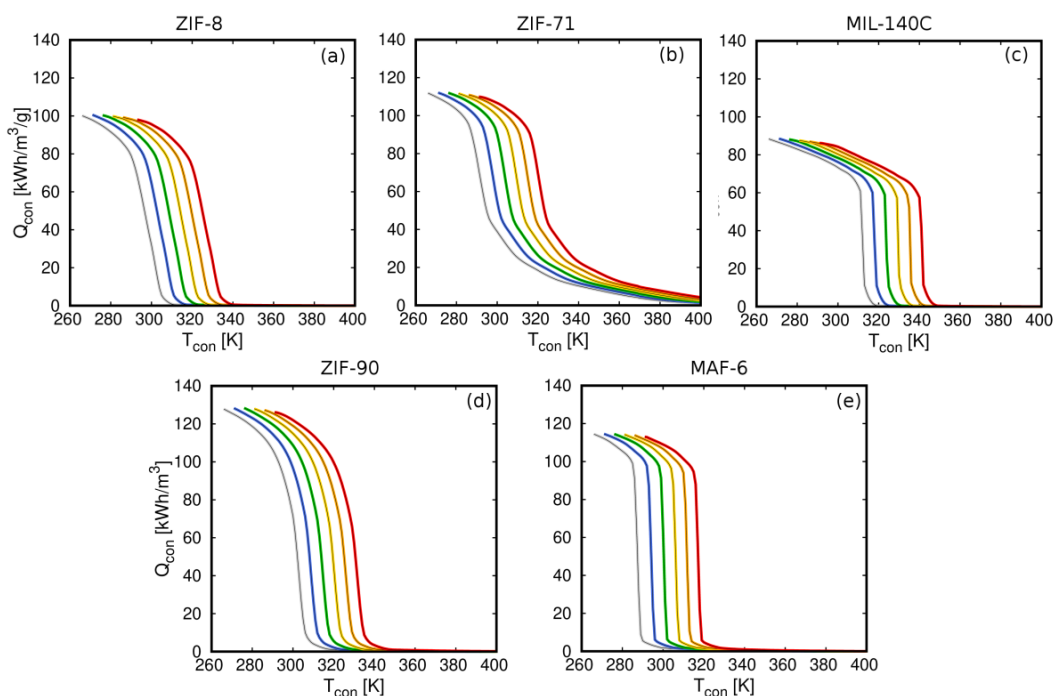

**Figure S7.** Volumetric heat energy transferred to the condenser ( $Q_{\text{con}}$ ) per unit of volume of MOF using methanol in all MOFs with variation of the temperature of the evaporator assuming full desorption.

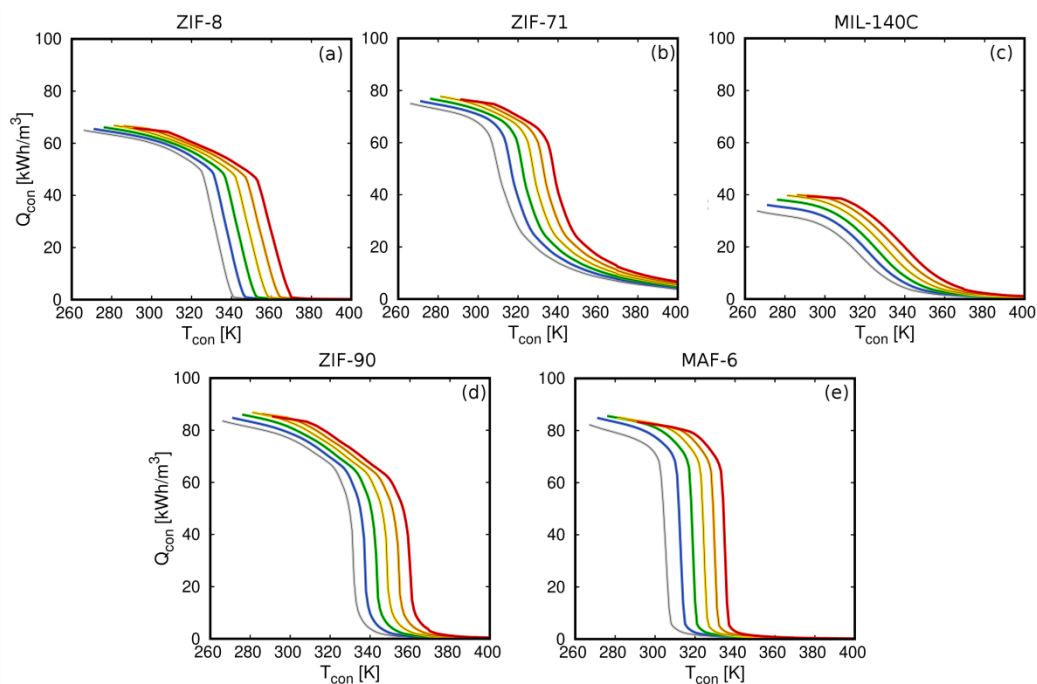

**Figure S8.** Volumetric heat energy transferred to the condenser ( $Q_{\text{con}}$ ) per unit of volume of MOF using ethanol in all MOFs with variation of the temperature of the evaporator assuming full desorption.

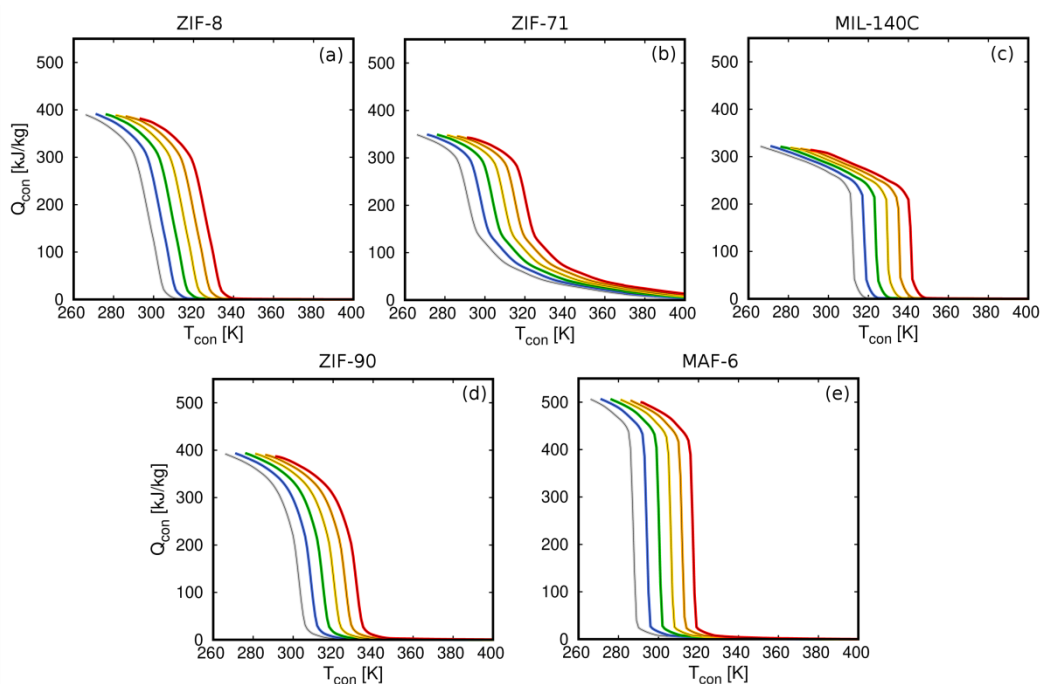

**Figure S9.** Gravimetric heat energy transferred to the condenser ( $Q_{\text{con}}$ ) per unit of volume of MOF using methanol in all MOFs with variation of the temperature of the evaporator assuming full desorption.



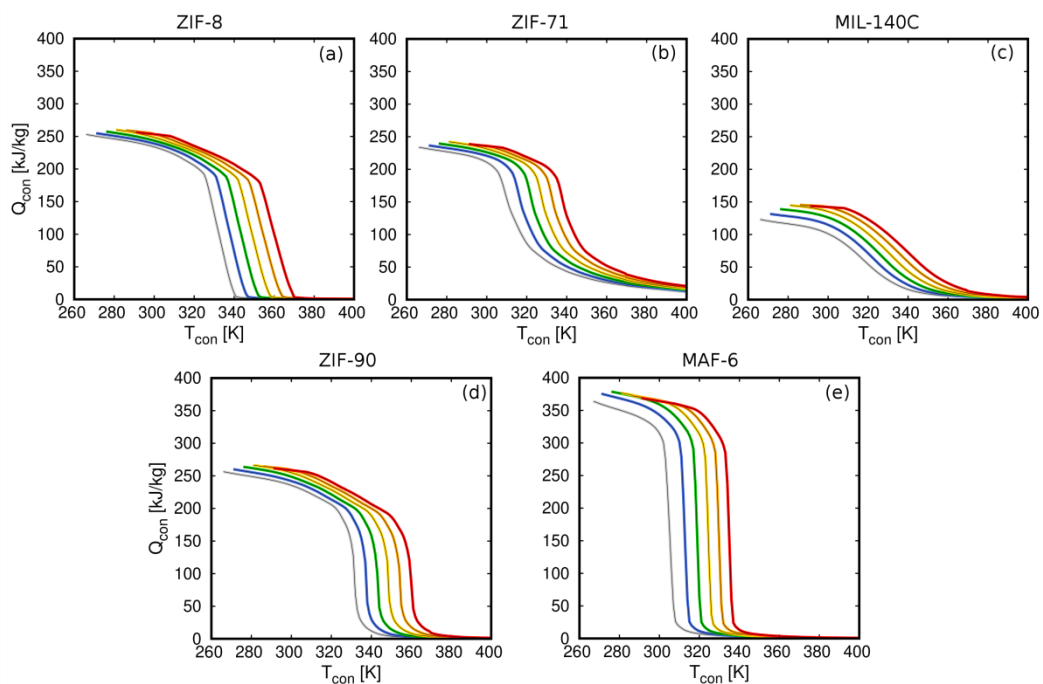

**Figure S10.** Gravimetric heat energy transferred to the condenser ( $Q_{con}$ ) per unit of volume of MOF using ethanol in all MOFs with variation of the temperature of the evaporator assuming full desorption.

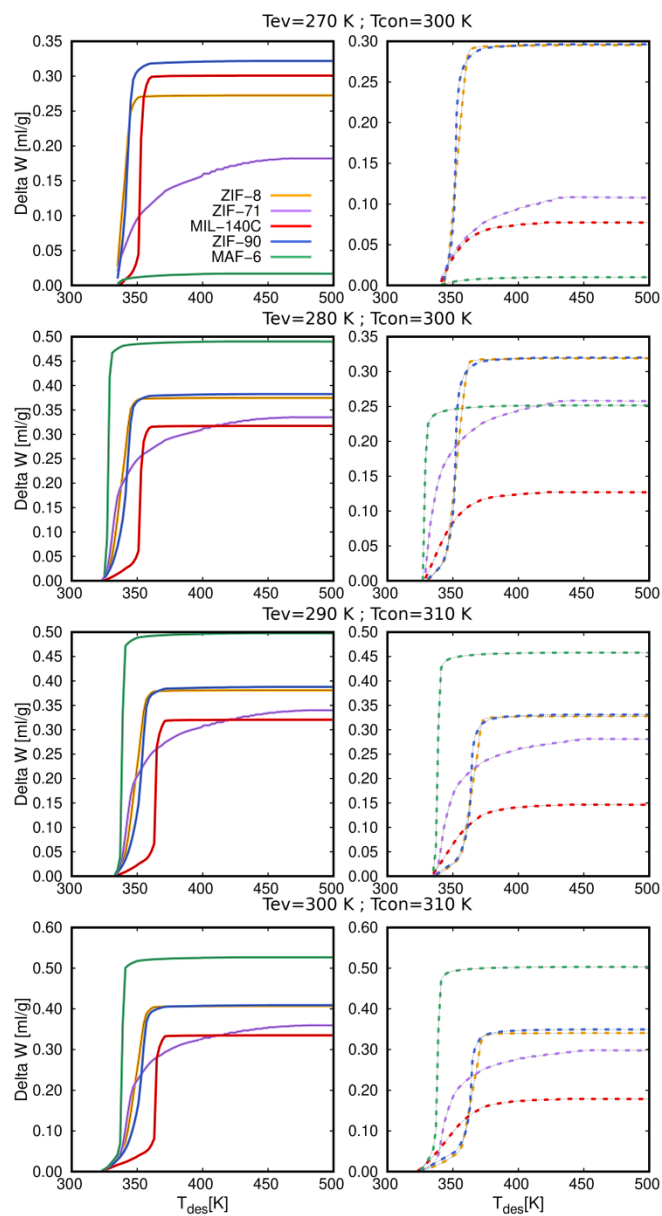

**Figure S11.** Deliverable capacity for methanol (solid lines) and ethanol (dashed lines) as a function of the desorption temperature for varying the temperatures of the evaporator and condenser.

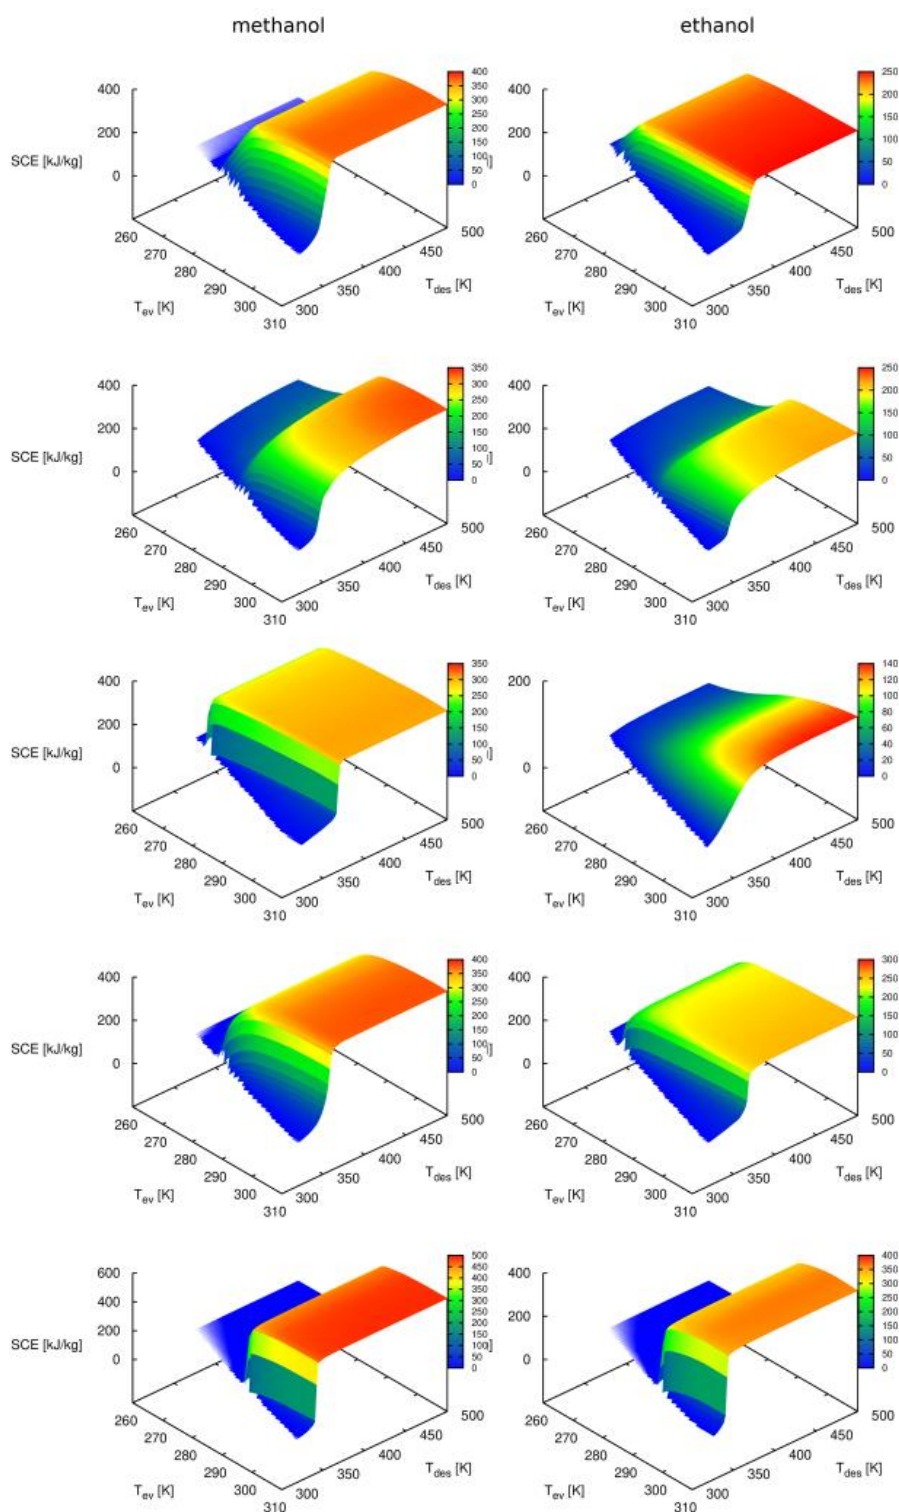

**Figure S12.** SCE of methanol and ethanol in all MOFs at  $T_{\text{con}}=313$  K. From top to bottom, ZIF-8, ZIF-71, MIL-140C, ZIF-90, and MAF-6, respectively.

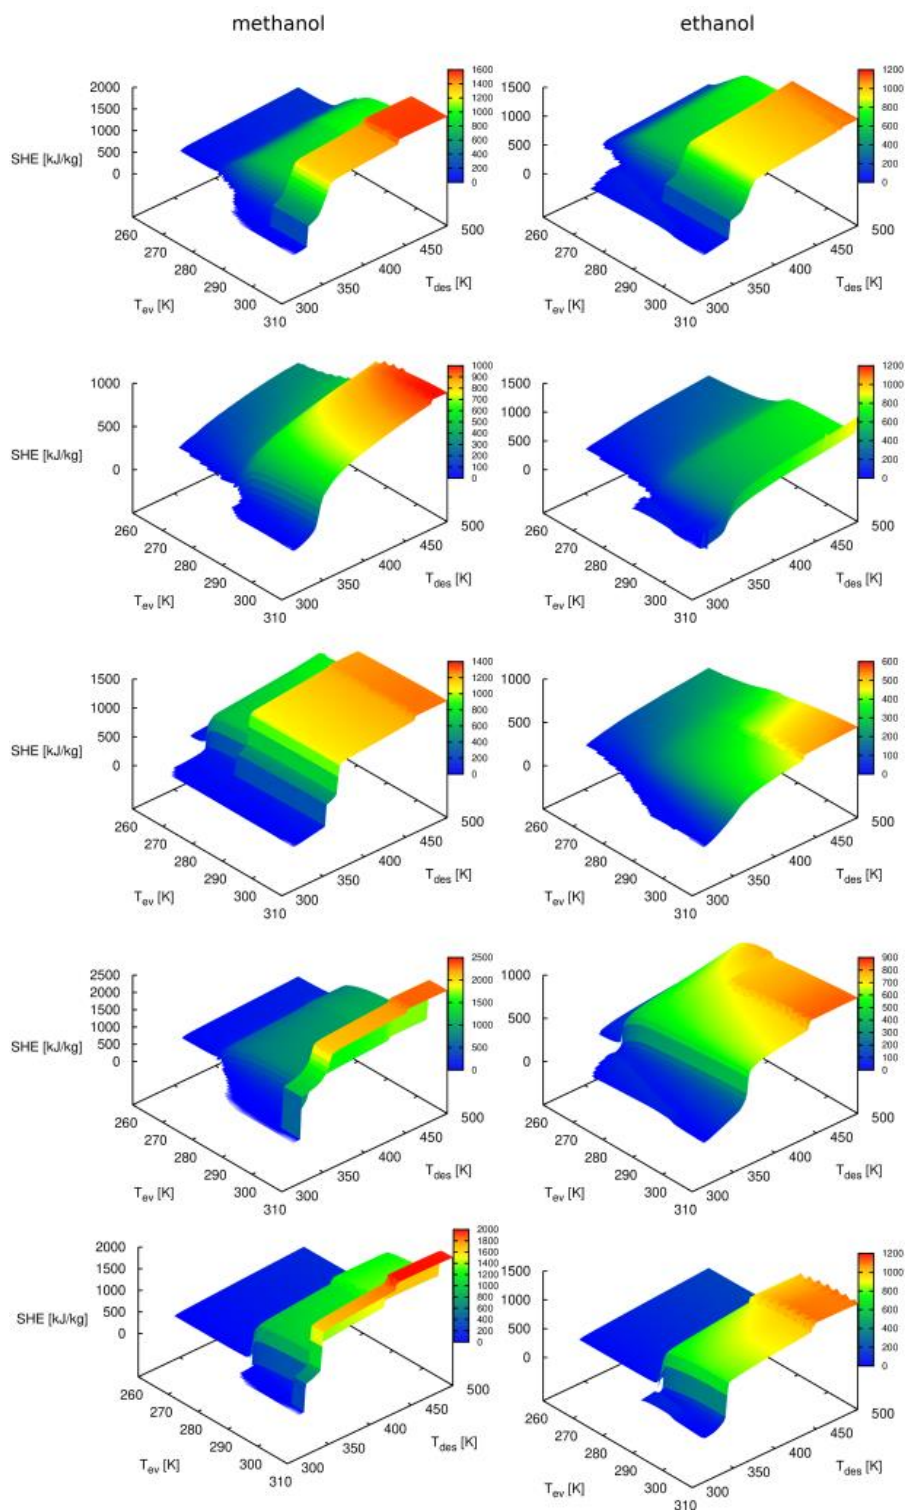

**Figure S13.** SHE of methanol and ethanol in all MOFs at  $T_{\text{con}}=313$  K. From top to bottom, ZIF-8, ZIF-71, MIL-140C, ZIF-90, and MAF-6, respectively.

## REFERENCES

- [1] Ke Zhang, Ryan P. Lively, Michelle E. Dose, Andrew J. Brown, Chen Zhang, Jaeyub Chung, Sankar Nair, William J. Koros, and Ronald R. Chance, "Alcohol and water adsorption in zeolitic imidazolate frameworks," *Chem. Commun.* **49**, 3245–3247 (2013).

[2] He, C.-T.; Jiang, L.; Ye, Z.-M.; Krishna, R.; Zhong, Z.-S.; Liao, P.-Q.; Xu, J.; Ouyang, G.; Zhang, J.-P.; Chen, X.-M. Exceptional Hydrophobicity of a Large-Pore Metal-Organic Zeolite. *J. Am. Chem. Soc.* **137**, 7217–7223 (2015).

[3] Martijn F. de Lange, Benjamin L. van Velzen, Coen P. Ottevanger, Karlijn J. F. M. Verouden, Li-Chiang Lin, Thijs J. H. Vlugt, Jorge Gascon, and Freek Kapteijn, “Metal–organic frameworks in adsorption-driven heat pumps: The potential of alcohols as working fluids,” *Langmuir* **31**, 12783–12796 (2015).

[4] Juan Jose Gutierrez-Sevillano, Sofia Calero, Conchi O. Ania, Jose B. Parra, Freek Kapteijn, Jorge Gascon, and Said Hamad, “Toward a transferable set of charges to model zeolitic imidazolate frameworks: Combined experimental–theoretical research,” *J. Phys. Chem. C* **117**, 466–471 (2013).
